# Supplementary material for: The Characterization of Haze and Dust Processes Using MAX-DOAS in Beijing, China
Source: MDPI journal article supplement (doi:10.3390/rs13245133), 2021-12-17
Supplement: s1 [file s1]

# The Characterization of Haze and Dust Processes Using MAX-DOAS in Beijing, China

## Supplementary Materials

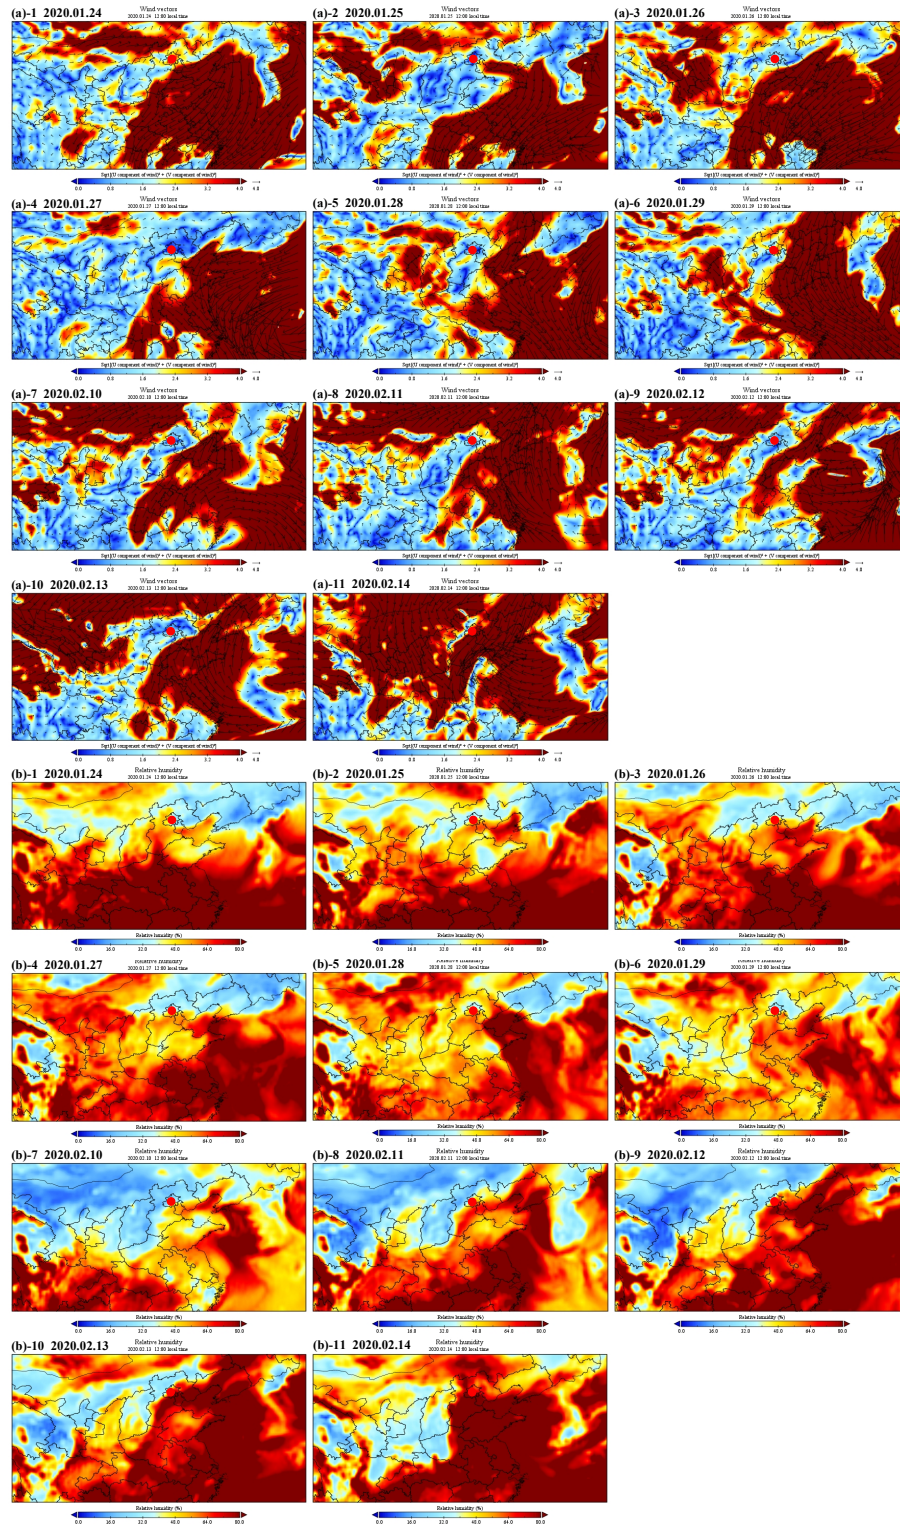

**Figure S1.** The regional distribution of wind vectors (a) and RH (b) from ERA5 climate reanalysis data during haze pollution periods. 1 to 11 represent different dates. The red dots represent Beijing.

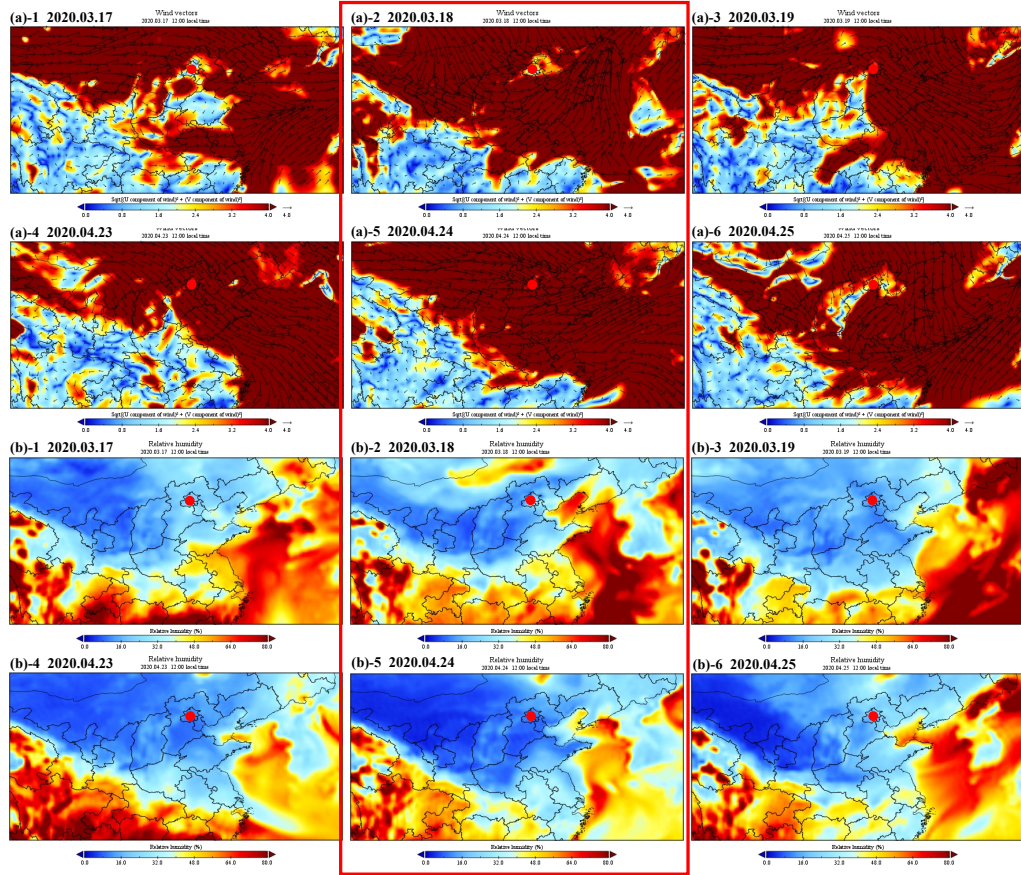

**Figure S2.** The regional distribution of wind vectors (a) and RH (b) from ERA5 climate reanalysis data during dust pollution periods. 1 to 6 represent different dates. The red dots represent Beijing. The two red boxes represent the dusty days in the figure.

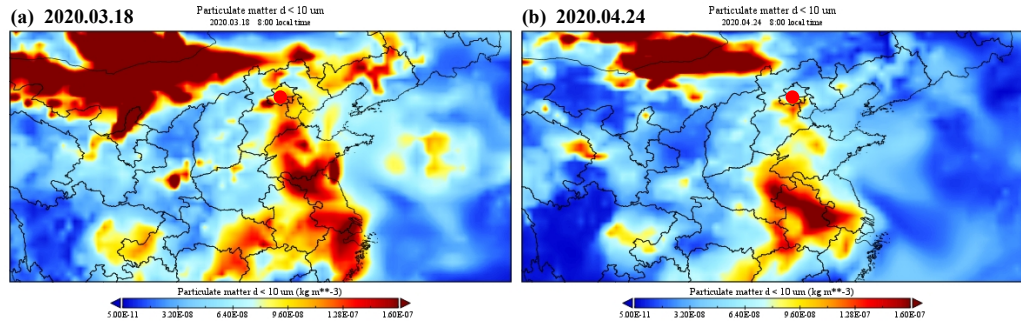

**Figure S3.** The regional distribution of PM<sub>10</sub> from the CAMS model on dusty days (March 18 and April 24). (a) March 18; (b) April 24. The red dots represent Beijing.
